# Supplementary material for: Genetic Predisposition, Fruit Intake and Incident Stroke: A Prospective Chinese Cohort Study
Source: MDPI journal article supplement (doi:10.3390/nu14235056), 2022-11-28
Supplement: s1 [file s1]

## **Supplementary Material**

### **Additional details of fruit intake assessment**

The trained and certificated interviewer asked each participant to report how often, on average, they have consumed each food item on a daily, weekly, monthly, yearly, or never scale over the past 12 months at baseline and during follow-up visits, followed by a question on the amount consumed in liang (1 liang=50 g) per unit of time. The food items include fresh fruit, fresh vegetables, legumes, egg, fish, red meat, milk, poultry meat, salted vegetables, nut, and tea. Combined with intake amounts, the intake frequencies were converted into the average daily intake for each food item. Processed fruit was excluded.

### **Additional details of SNP selection and PRS construction**

We selected 588 single-nucleotide polymorphisms (SNPs) that showed genome-wide significant associations ( $P < 5 \times 10^{-8}$ ) with stroke and its-related traits, including blood pressure (BP), coronary artery disease (CAD), type 2 diabetes (T2D), lipids, obesity, and atrial fibrillation (AF), based on previous genome-wide association study (GWASs).

The selected SNPs associated with stroke and CAD were reported amongst East Asian and European populations due to the limited number of loci identified in East Asian individuals. For other traits, we mainly included the reported SNPs in East Asian ancestry. Genotyping for all participants was performed by multiplex PCR targeted amplicon sequencing technology. We designed multiplexed primers targeting each SNP and amplified the target regions for high-throughput sequencing on a Hiseq

X10 sequencer (Illumina). Finally, a total of 534 SNPs remained for the present analysis after strict quality control.

| The number of SNPs included                                                                                                               |                |
|-------------------------------------------------------------------------------------------------------------------------------------------|----------------|
| Traits                                                                                                                                    | Number of SNPs |
| Stroke                                                                                                                                    | 42             |
| Blood pressure (systolic BP, SBP; diastolic BP, DBP; pulse pressure, PP; mean arterial pressure, MAP)                                     | 46             |
| Coronary artery disease                                                                                                                   | 199            |
| Type 2 diabetes                                                                                                                           | 89             |
| Obesity (body mass index, BMI; waist circumference, WC; waist hip ratio, WHR)                                                             | 79             |
| Lipids (total cholesterol, TC; triglyceride, TG; low density lipoprotein cholesterol, LDL-C; high density lipoprotein cholesterol, HDL-C) | 126            |
| Atrial fibrillation                                                                                                                       | 16             |
| Total                                                                                                                                     | 588            |

Fourteen trait-specific PRSs (stroke, CAD, T2D, AF, SBP, DBP, PP, MAP, BMI, WC, TC, TG, LDL-C, and HDL-C) were calculated separately by adding the number of corresponding risk alleles (0,1,2) weighted by the effect size of each SNP on each trait. For stroke, the effect sizes were extracted from summary statistics of the largest stroke GWAS conducted by Biobank Japan (17,671 stroke cases and 192,383 controls). For stroke-related traits, the effect size data were drawn from large-scale GWASs for each trait conducted among East Asian individuals, and those containing Chinese samples were selected in priority if more than one GWAS were reported. Details of utilized GWAS studies were published elsewhere.

For each trait, we constructed 16 candidate PRS using different threshold values for linkage disequilibrium (LD) metric  $r^2$  (0.2, 0.4, 0.6, 0.8) and  $P$  value (0.5, 0.05,  $5 \times 10^{-4}$ ,  $5 \times 10^{-6}$ ) based on trait-specific summary statistics from the large-scale GWAS.

The score with the largest magnitude of odds ratio (OR) (per SD increase of PRS) for stroke in the training set (case control study design in China, 2872 stroke cases and 2494 controls) was selected as the optimal trait-specific PRS. Each optimal PRS was standardized to zero mean and unit SD. The elastic-net logistic regression with 10-fold cross-validation was used to model the associations between the 14 optimal PRS and stroke and further to generate the metaPRS.

**Table S1. Information about the selected SNPs and the interplay between single SNP and fruit intake**

| SNP        | Chr: Pos_hg19 | Gene         | Effect allele | MAF in cohort | Trait     | <i>P</i> multiplicative interaction | <i>P</i> additive interaction |
|------------|---------------|--------------|---------------|---------------|-----------|-------------------------------------|-------------------------------|
| rs880315   | 1:10796866    | CASZ1        | T             | 0.38          | BP;stroke | 0.15                                | 0.1                           |
| rs7528419  | 1:109817192   | CELSR2       | G             | 0.06          | CAD       | 0.83                                | 0.49                          |
| rs12740374 | 1:109817590   | CELSR2       | T             | 0.06          | LDL-C;TC  | 0.7                                 | 0.37                          |
| rs12037987 | 1:113042822   | WNT2B        | C             | 0.3           | stroke    | 0.34                                | 0.21                          |
| rs10745332 | 1:113189053   | CAPZA1       | G             | 0.18          | BP        | 0.3                                 | 0.59                          |
| rs17030613 | 1:113190807   | CAPZA1       | C             | 0.47          | BP        | 0.21                                | 0.51                          |
| rs4846049  | 1:11850365    | MTHFR        | T             | 0.17          | BP        | 0.2                                 | 0.48                          |
| rs984222   | 1:119503843   | TBX15        | C             | 0.4           | WHR       | 0.21                                | 0.01                          |
| rs10923931 | 1:120517959   | NOTCH2       | T             | 0.03          | T2D       | 0.78                                | 0.15                          |
| rs11810571 | 1:151762308   | TDRKH        | G             | 0.5           | CAD       | 0.8                                 | 0.58                          |
| rs67156297 | 1:154336716   | RP11-350G8.4 | A             | 0.09          | T2D       | 0.74                                | 0.9                           |
| rs4845625  | 1:154422067   | IL6R         | T             | 0.49          | CAD       | 0.39                                | 0.1                           |
| rs6666258  | 1:154814268   | KCNN3        | C             | 0.03          | AF        | 0.51                                | 0.74                          |
| rs1052053  | 1:156202173   | PMF1-SEMA4A  | G             | 0.34          | stroke    | 0.38                                | 0.88                          |
| rs2758607  | 1:156202759   | PMF1-BGLAP   | A             | 0.34          | stroke    | 0.45                                | 0.9                           |
| rs1892094  | 1:169094459   | ATP1B1       | T             | 0.06          | CAD       | 0.72                                | 0.98                          |
| rs1200159  | 1:169100241   | ATP1B1       | T             | 0.17          | CAD       | 0.1                                 | 0.62                          |
| rs3903239  | 1:170569317   | RP1-79C4.1   | A             | 0.4           | AF        | 0.12                                | 0.8                           |
| rs2213732  | 1:172333595   | DNM3         | G             | 0.13          | WHR       | 0.94                                | 0.14                          |
| rs574367   | 1:177873210   | SEC16B       | T             | 0.2           | BMI       | 0.25                                | 0.66                          |
| rs1689800  | 1:182168885   | LINC01344    | G             | 0.3           | HDL-C     | 0.69                                | 0.76                          |
| rs6700559  | 1:200646073   | RP11-92G12.3 | C             | 0.31          | CAD       | 0.12                                | 0.04                          |
| rs2820315  | 1:201872264   | LMOD1        | T             | 0.12          | CAD       | 0.52                                | 0.48                          |
| rs2819348  | 1:201884952   | LMOD1        | C             | 0.12          | CAD       | 0.86                                | 0.6                           |
| rs60154123 | 1:210468999   | RP4-667H12.4 | T             | 0.29          | CAD       | 0.62                                | 0.44                          |
| rs2075423  | 1:214154719   | PROX1        | T             | 0.17          | T2D       | 0.21                                | 0.49                          |
| rs340874   | 1:214159256   | PROX1        | C             | 0.39          | T2D       | 0.5                                 | 0.73                          |
| rs2820443  | 1:219753509   | RP11-95P13.2 | C             | 0.29          | WHR       | 0.79                                | 0.74                          |
| rs2642442  | 1:220973563   |              | C             | 0.15          | TC;LDL-C  | 0.45                                | 0.79                          |
| rs17465637 | 1:222823529   | MIA3         | A             | 0.39          | CAD       | 0.71                                | 0.33                          |
| rs67180937 | 1:222823743   | MIA3         | T             | 0.42          | CAD       | 0.6                                 | 0.45                          |
| rs36096196 | 1:2252205     | MORN1        | T             | 0.14          | CAD       | 0.98                                | 0.55                          |
| rs2144300  | 1:230294916   | GALNT2       | T             | 0.18          | TG        | 0.87                                | 0.53                          |
| rs699      | 1:230845794   | AGT          | A             | 0.19          | CAD       | 0.5                                 | 0.9                           |
| rs2783963  | 1:243501583   | SDCCAG8      | A             | 0.08          | BMI       | 0.4                                 | 0.64                          |
| rs12027135 | 1:25775733    | TMEM57       | T             | 0.31          | TC;LDL-C  | 0.43                                | 0.47                          |
| rs61776719 | 1:38461319    | SF3A3        | A             | 0.33          | CAD       | 0.37                                | 0.79                          |
| rs2296172  | 1:39835817    | MACF1        | G             | 0.17          | HDL-C     | 0.42                                | 0.39                          |
| rs11205760 | 1:51174330    | FAF1         | C             | 0.22          | T2D       | 0.21                                | 0.18                          |

|             |             |             |   |      |             |      |        |
|-------------|-------------|-------------|---|------|-------------|------|--------|
| rs11206510  | 1:55496039  | PCSK9       | C | 0.06 | CAD         | 0.45 | 0.62   |
| rs7525649   | 1:55499156  | PCSK9       | C | 0.35 | LDL-C;TC    | 0.12 | 0.36   |
| rs151193009 | 1:55509585  | PCSK9       | T | 0.02 | LDL-C;TC    | 0.96 | 0.99   |
| rs9970807   | 1:56965664  | PLPP3       | T | 0.03 | CAD         | 0.08 | 0.25   |
| rs12042319  | 1:63049819  | DOCK7       | A | 0.2  | TC;TG       | 0.35 | 0.82   |
| rs995000    | 1:63107526  | DOCK7       | T | 0.19 | TG          | 0.4  | 0.85   |
| rs10889353  | 1:63118196  | DOCK7       | C | 0.19 | TC;TG       | 0.4  | 0.83   |
| rs2815752   | 1:72812440  | RPL31P12    | G | 0.08 | BMI         | 0.48 | 0.88   |
| rs1514175   | 1:74991644  | FPGT-TNNI3K | G | 0.23 | BMI         | 0.28 | 0.25   |
| rs17381664  | 1:78048331  | ZZZ3        | C | 0.01 | BMI         | 0.54 | 0.69   |
| rs117711462 | 1:93159927  | EVI5        | A | 0.01 | LDL-C;TC    | 0.52 | 0.33   |
| rs1555543   | 1:96944797  | EEF1A1P11   | A | 0.13 | BMI         | 0.52 | 0.76   |
| rs17678683  | 2:145286559 | ZEB2        | G | 0.05 | CAD         | 0.61 | 0.61   |
| rs7560163   | 2:151637936 | AC104777.4  | G | 0.1  | T2D         | 0.09 | 0.37   |
| rs4377290   | 2:158437683 | ACVR1C      | C | 0.31 | TC          | 0.18 | 0.76   |
| rs16849225  | 2:164906820 | AC092684.1  | T | 0.4  | BP          | 0.03 | 0.02   |
| rs12999907  | 2:164957251 | AC092684.1  | G | 0.37 | CAD         | 0.04 | <0.001 |
| rs12692735  | 2:165504565 | COBLL1      | T | 0.1  | T2D         | 0.34 | 0.68   |
| rs840616    | 2:188196469 | AC007319.1  | T | 0.11 | CAD         | 0.47 | 0.16   |
| rs1344653   | 2:19730845  | LINC01808   | G | 0.18 | BP          | 0.78 | 0.93   |
| rs16986953  | 2:19942473  | AC019055.1  | A | 0.35 | CAD         | 0.28 | 0.97   |
| rs2123536   | 2:19945577  | AC019055.1  | T | 0.37 | CAD         | 0.08 | 0.92   |
| rs6725887   | 2:203745885 | WDR12       | C | 0.02 | CAD         | 0.52 | 0.55   |
| rs13306194  | 2:21252534  | APOB        | A | 0.12 | LDL-C;TC;TG | 0.2  | 0.85   |
| rs1367117   | 2:21263900  | APOB        | A | 0.13 | TC;LDL-C    | 0.17 | 0.1    |
| rs515135    | 2:21286057  | APOB        | T | 0.11 | CAD         | 0.94 | 0.29   |
| rs312949    | 2:21334283  | TDRD15      | C | 0.27 | LDL-C;TC    | 0.29 | 0.38   |
| rs17517928  | 2:216291359 | FN1         | T | 0    | CAD         | 0.64 | 0.15   |
| rs1250229   | 2:216304384 | FN1         | T | 0.09 | CAD         | 0.58 | 0.62   |
| rs2571445   | 2:218683154 | TNS1        | A | 0.4  | CAD         | 0.98 | 0.26   |
| rs2972146   | 2:227100698 | NEU2        | G | 0.07 | CAD         | 0.87 | 0.32   |
| rs2972143   | 2:227116365 | NEU2        | A | 0.07 | HDL-C       | 0.38 | 0.21   |
| rs11677932  | 2:238223955 | STK25       | A | 0.35 | CAD         | 0.4  | 0.76   |
| rs6545814   | 2:25131316  | ADCY3       | G | 0.42 | BMI         | 0.59 | 0.99   |
| rs736699    | 2:26913930  | KCNK3       | G | 0.24 | stroke      | 0.39 | 0.96   |
| rs1275988   | 2:26914364  | KCNK3       | T | 0.24 | BP          | 0.28 | 0.89   |
| rs1260326   | 2:27730940  | GCKR        | C | 0.47 | TC;TG       | 0.99 | 0.3    |
| rs780094    | 2:27741237  | GCKR        | C | 0.48 | T2D         | 0.99 | 0.45   |
| rs10203174  | 2:43690030  | THADA       | T | 0.01 | T2D         | 0.29 | 0.08   |
| rs35419456  | 2:43725965  | THADA       | A | 0.04 | T2D         | 0.83 | 0.38   |
| rs6544713   | 2:44073881  | ABCG8       | T | 0    | CAD         | 0.34 | 0.21   |
| rs582384    | 2:45896437  | PRKCE       | A | 0.25 | CAD         | 0.19 | 0.25   |
| rs9309245   | 2:53397048  | AC010967.2  | G | 0.19 | T2D         | 0.16 | 0.02   |
| rs3791679   | 2:56096892  | EFEMP1      | A | 0.21 | WC          | 0.09 | 0.2    |

|            |             |                   |   |      |        |      |       |
|------------|-------------|-------------------|---|------|--------|------|-------|
| rs1116357  | 2:57287411  | RP11-443I9.1      | G | 0.24 | T2D    | 0.04 | 0.04  |
| rs1861411  | 2:58904177  | LINC01122         | A | 0.41 | BMI    | 0.18 | 0.7   |
| rs243019   | 2:60585806  | MIR4432HG         | T | 0.32 | T2D    | 0.7  | 0.34  |
| rs11125936 | 2:62871225  | AC092155.4        | C | 0.22 | LDL-C  | 0.25 | 0.7   |
| rs12463617 | 2:629244    | TMEM18            | A | 0.09 | BMI    | 0.92 | 0.46  |
| rs2861568  | 2:67571721  | AC023115.4        | T | 0.49 | WHR    | 0.14 | 0.55  |
| rs7568458  | 2:85788175  | GGCX              | A | 0.39 | CAD    | 0.58 | 0.8   |
| rs7616006  | 3:12267648  | LINC00690         | G | 0.35 | TC     | 0.1  | 0.98  |
| rs79223353 | 3:123139863 | ADCY5             | A | 0.37 | T2D    | 0.76 | 0.32  |
| rs1801282  | 3:12393125  | PPARG             | G | 0.06 | T2D    | 0.59 | 0.88  |
| rs17843768 | 3:124448385 | UMPS              | A | 0.08 | CAD    | 0.73 | 0.31  |
| rs17843797 | 3:124453022 | UMPS              | G | 0.08 | CAD    | 0.84 | 0.28  |
| rs2625967  | 3:129267259 | H1FOO             | G | 0.4  | WHR    | 0.23 | 0.09  |
| rs10512861 | 3:132257961 |                   | T | 0.12 | CAD    | 0.19 | 0.39  |
| rs667920   | 3:136069472 | STAG1             | G | 0.13 | CAD    | 0.82 | 0.76  |
| rs6807945  | 3:138052754 | NME9              | C | 0.23 | CAD    | 0.82 | 0.16  |
| rs9818870  | 3:138122122 | MRAS              | T | 0.01 | CAD    | 0.44 | 0.95  |
| rs7610618  | 3:149157706 | SIAH2             | T | 0.04 | stroke | 0.54 | 0.17  |
| rs748431   | 3:14928077  | FGD5              | T | 0.31 | CAD    | 0.27 | 0.75  |
| rs1868673  | 3:150187314 | TSC22D2           | A | 0.49 | WC     | 0.79 | 0.76  |
| rs4266144  | 3:156852592 | SPTSSB            | C | 0.32 | CAD    | 0.65 | 0.85  |
| rs12897    | 3:172115902 | FNDC3B            | A | 0.26 | CAD    | 0.68 | 0.47  |
| rs1470579  | 3:185529080 | IGF2BP2           | C | 0.26 | T2D    | 0.59 | 0.11  |
| rs10513801 | 3:185822353 | ETV5              | G | 0.04 | BMI    | 0.12 | 0.11  |
| rs17301514 | 3:186613409 | RPS20P14          | A | 0.05 | T2D    | 0.89 | 0.56  |
| rs6808574  | 3:187740523 | TMEM207           | T | 0.01 | T2D    | 0.18 | 0.06  |
| rs1496653  | 3:23454790  | UBE2E2            | G | 0.21 | T2D    | 0.13 | 0.39  |
| rs820430   | 3:27548900  | FECHP1            | A | 0.32 | BP     | 0.09 | 0.13  |
| rs9815354  | 3:41912651  | ULK4              | A | 0.19 | BP     | 0.37 | 0.78  |
| rs7633770  | 3:46688562  | SNORD77           | A | 0.23 | CAD    | 0.46 | 0.68  |
| rs7617773  | 3:48193515  | TKT               | C | 0.31 | CAD    | 0.65 | 0.61  |
| rs2535633  | 3:52859630  | ITIH4             | G | 0.41 | BMI    | 0.35 | 0.9   |
| rs9810888  | 3:53635595  | CACNA1D           | G | 0.4  | BP     | 0.36 | 0.003 |
| rs9828933  | 3:64002897  | PSMD6             | C | 0.31 | T2D    | 0.5  | 0.57  |
| rs6795735  | 3:64705365  | ADAMTS9-<br>AS2   | C | 0.25 | T2D    | 0.65 | 0.89  |
| rs13078807 | 3:85884150  | CADM2             | G | 0    | BMI    | 0.1  | 0.32  |
| rs6825911  | 4:111381638 | ENPEP             | C | 0.47 | BP     | 0.22 | 0.48  |
| rs1448818  | 4:111570223 | RP11-<br>119H12.3 | C | 0.36 | AF     | 0.86 | 0.56  |
| rs6817105  | 4:111705768 | RP11-<br>119H12.3 | T | 0.48 | AF     | 0.52 | 0.93  |
| rs2200733  | 4:111710169 | RP11-<br>119H12.3 | C | 0.49 | stroke | 0.48 | 0.82  |

|            |             |                   |   |      |             |      |      |
|------------|-------------|-------------------|---|------|-------------|------|------|
| rs13143308 | 4:111714419 | LINC01438         | G | 0.28 | stroke      | 0.82 | 0.82 |
| rs4400058  | 4:111716673 | LINC01438         | A | 0.2  | AF          | 0.42 | 0.67 |
| rs6838973  | 4:111765495 | RP11-<br>119H12.3 | C | 0.39 | AF          | 0.63 | 0.43 |
| rs13115759 | 4:113710461 | RPL7AP30          | A | 0.35 | stroke      | 0.36 | 0.71 |
| rs10010670 | 4:113711748 | RPL7AP30          | G | 0.35 | stroke      | 0.37 | 0.8  |
| rs7678555  | 4:120909501 | RP11-<br>170N16.1 | C | 0.21 | CAD         | 0.52 | 0.79 |
| rs73069940 | 4:1236502   | CTBP1             | G | 0.34 | T2D         | 0.21 | 0.88 |
| rs4593108  | 4:148281001 | FHDC1             | G | 0.33 | CAD         | 0.47 | 0.75 |
| rs17612742 | 4:148414651 | EDNRA             | C | 0.22 | stroke      | 0.12 | 0.06 |
| rs6813195  | 4:153520475 | FHDC1             | T | 0.45 | T2D         | 0.08 | 0.85 |
| rs6825454  | 4:155501188 | FGA               | C | 0.47 | stroke      | 0.24 | 0.61 |
| rs1976041  | 4:156486040 | TOMM22P4          | A | 0.23 | CAD         | 0.57 | 0.66 |
| rs13143871 | 4:156619204 | GUCY1A3           | C | 0.21 | BP          | 0.28 | 0.02 |
| rs72689147 | 4:156639888 | GUCY1A3           | T | 0.19 | CAD         | 0.43 | 0.02 |
| rs7696431  | 4:169687725 | PALLD             | T | 0.45 | CAD         | 0.74 | 0.51 |
| rs6818397  | 4:3434885   | RGS12             | T | 0.49 | TG          | 0.14 | 0.81 |
| rs16844401 | 4:3449652   | HGFAC             | A | 0.09 | CAD         | 0.72 | 0.34 |
| rs6831256  | 4:3473139   | DOK7              | G | 0.36 | TG          | 0.16 | 0.75 |
| rs16858082 | 4:45175804  | NMU               | T | 0.34 | BMI         | 0.43 | 0.35 |
| rs871606   | 4:54799245  | RP11-231C18.3     | C | 0.19 | BP          | 0.83 | 0.76 |
| rs17087335 | 4:57838583  | NOA1              | T | 0.4  | CAD         | 0.41 | 0.68 |
| rs4458523  | 4:6289986   | WFS1              | T | 0.05 | T2D         | 0.99 | 0.53 |
| rs12500824 | 4:77416627  | SHROOM3           | A | 0.45 | CAD         | 0.73 | 0.66 |
| rs1902859  | 4:81157703  | RP11-<br>576N17.4 | C | 0.41 | BP          | 0.38 | 0.2  |
| rs10857147 | 4:81181072  | RP11-<br>576N17.4 | T | 0.4  | CAD         | 0.04 | 0.12 |
| rs11099493 | 4:82587050  | RASGEF1B          | G | 0.2  | CAD         | 0.61 | 0.36 |
| rs6829822  | 4:86716496  | ARHGAP24          | T | 0.18 | BP          | 0.47 | 0.41 |
| rs1037814  | 4:88049850  | AFF1              | T | 0.42 | TG          | 0.87 | 0.79 |
| rs3775058  | 4:96117371  | UNC5C             | T | 0.49 | CAD         | 0.47 | 0.29 |
| rs10064156 | 5:102413873 | RP11-<br>231G15.1 | C | 0.19 | T2D         | 0.01 | 0.35 |
| rs11957829 | 5:121515195 | CTC-441N14.4      | G | 0.08 | stroke      | 0.64 | 0.43 |
| rs13359291 | 5:122476457 | PRDM6             | G | 0.39 | BP          | 0.07 | 0.71 |
| rs10051787 | 5:122732236 | CEP120            | T | 0.41 | WC          | 0.28 | 0.29 |
| rs7701094  | 5:124317011 | LMNB1             | C | 0.48 | BMI         | 0.89 | 0.35 |
| rs273909   | 5:131667353 | SLC22A4           | G | 0.03 | CAD         | 0.94 | 0.94 |
| rs246600   | 5:142516897 | ARHGAP26          | T | 0.12 | CAD         | 0.95 | 0.29 |
| rs9687065  | 5:148391140 | SH3TC2            | G | 0.24 | BP          | 0.97 | 0.31 |
| rs6882076  | 5:156390297 | TIMD4             | T | 0.26 | TG;LDL-C;TC | 0.94 | 0.81 |

|              |             |                   |   |      |          |       |      |
|--------------|-------------|-------------------|---|------|----------|-------|------|
| rs351855     | 5:176520243 | FGFR4             | A | 0.42 | WHR      | 0.4   | 0.75 |
| rs634501     | 5:180218668 | MGAT1             | A | 0.48 | HDL-C    | 0.68  | 0.42 |
| rs1173766    | 5:32804528  | CTD-<br>2197M16.1 | T | 0.35 | BP       | 0.17  | 0.58 |
| rs702634     | 5:53271420  | ARL15             | G | 0.12 | T2D      | 0.52  | 0.47 |
| rs459193     | 5:55806751  | C5orf67           | A | 0.47 | T2D      | 0.15  | 0.38 |
| rs3936511    | 5:55860781  | C5orf67           | G | 0.11 | CAD      | 0.39  | 0.3  |
| rs6871667    | 5:74604742  | JMY               | G | 0.45 | TC;LDL-C | 0.11  | 0.03 |
| rs191835914  | 5:74646765  | HMGCR             | C | 0.02 | LDL-C    | 0.98  | 0.32 |
| rs3846663    | 5:74655726  | HMGCR             | C | 0.48 | TC;LDL-C | 0.55  | 0.28 |
| rs888789     | 5:74988369  | POC5              | A | 0.46 | BMI      | 0.84  | 0.37 |
| rs6878122    | 5:76427311  |                   | G | 0.05 | T2D      | 0.64  | 0.47 |
| rs1508798    | 5:9556694   | RP11-260E18.1     | C | 0.1  | CAD      | 0.86  | 0.83 |
| rs261967     | 5:95850250  | CTD-<br>2337A12.1 | C | 0.43 | BMI      | 0.79  | 0.09 |
| rs9390698    | 6:101296389 | ASCC3             | A | 0.29 | LDL-C;TC | 0.73  | 0.82 |
| rs884366     | 6:109574095 | CCDC162P          | A | 0.38 | HDL-C    | 0.81  | 0.57 |
| rs13216675   | 6:122452329 | TRMT11            | C | 0.4  | AF       | 0.25  | 0.62 |
| rs1591805    | 6:126717064 | RP11-394G3.2      | A | 0.02 | CAD      | 0.83  | 0.63 |
| LOC105377992 |             |                   |   |      |          |       |      |
| rs13209747   | 6:127115454 | -                 | T | 0.48 | BP       | 0.001 | 0.17 |
| LOC105377991 |             |                   |   |      |          |       |      |
| rs9349379    | 6:12903957  | PHACTR1           | A | 0.28 | CAD      | 0.04  | 0.85 |
| rs12204590   | 6:1337393   | RP11-157J24.2     | A | 0.01 | stroke   | 0.04  | 0.73 |
| rs12202017   | 6:134173151 | TARID             | G | 0.43 | CAD      | 0.45  | 0.22 |
| rs12524865   | 6:134196674 | TARID             | A | 0.42 | CAD      | 0.61  | 0.25 |
| rs78169666   | 6:1349830   | RP11-157J24.2     | C | 0    | stroke   | 0.4   | 0.33 |
| rs9376090    | 6:135411228 | HBS1L             | C | 0.3  | TC       | 0.15  | 0.05 |
| rs17080091   | 6:150997401 | PLEKHG1           | T | 0.06 | CAD      | 0.86  | 0.96 |
| rs17080102   | 6:151004770 | PLEKHG1           | C | 0.06 | BP       | 0.9   | 0.98 |
| rs368123     | 6:160719593 |                   | G | 0.45 | WC       | 0.22  | 0.99 |
| rs3120140    | 6:160738831 |                   | A | 0.08 | CAD      | 0.3   | 0.91 |
| rs10455782   | 6:160839350 | SLC22A3           | T | 0.24 | CAD      | 0.96  | 0.08 |
| rs376563     | 6:160851766 | SLC22A3           | T | 0.39 | CAD      | 0.44  | 0.59 |
| rs12214416   | 6:160910517 | LPAL2             | A | 0.02 | CAD      | 0.14  | 0.4  |
| rs7770628    | 6:161018174 | LPA               | C | 0.12 | TC;LDL-C | 0.39  | 0.26 |
| rs9501744    | 6:1617143   | FOXC1             | T | 0    | CAD      | 0.31  | 0.08 |
| rs6909752    | 6:22612629  | ZFP57             | A | 0.2  | CAD      | 0.33  | 0.73 |
| rs1799945    | 6:26091179  | HFE               | G | 0.04 | BP       | 0.06  | 0.13 |
| rs130071     | 6:31116210  | CCHCR1            | A | 0.09 | TG       | 0.27  | 0.01 |
| rs3130501    | 6:31136453  | POU5F1            | A | 0.29 | T2D      | 0.95  | 0.46 |
| rs9357121    | 6:31240479  | HLA-B             | G | 0.17 | TC;LDL-C | 0.01  | 0.02 |
| rs9266359    | 6:31332739  | DHFRP2            | T | 0.41 | BP       | 0.18  | 0.76 |
| rs2021783    | 6:32044851  | TNXB              | T | 0.22 | BP       | 0.03  | 0.02 |



|            |             |              |   |      |                  |      |      |
|------------|-------------|--------------|---|------|------------------|------|------|
| rs9268402  | 6:32341353  | C6orf10      | A | 0.4  | CAD              | 0.17 | 0.18 |
| rs3129853  | 6:32398648  | TBC1D22B     | A | 0.16 | TG               | 0.06 | 0.01 |
| rs4713766  | 6:34244245  | NUDT3        | A | 0.09 | BMI              | 0.87 | 0.11 |
| rs17609940 | 6:35034800  | ANKS1A       | C | 0.02 | CAD              | 0.65 | 0.56 |
| rs1321309  | 6:36638636  | LAP3P2       | A | 0.31 | CAD              | 0.87 | 0.73 |
| rs9470794  | 6:38106844  | ZFAND3       | C | 0.31 | T2D              | 0.5  | 0.72 |
| rs56336142 | 6:39134099  | ACTG1P9      | C | 0.16 | CAD              | 0.88 | 0.86 |
| rs1535500  | 6:39284050  | KCNK16       | T | 0.46 | T2D              | 0.15 | 0.54 |
| rs16896398 | 6:43262704  | SLC22A7      | T | 0.27 | stroke           | 0.66 | 0.84 |
| rs6905288  | 6:43758873  | VEGFA        | G | 0.27 | HDL-<br>C;CAD;TG | 0.03 | 0.01 |
| rs556621   | 6:44594159  | ACTG1P9      | T | 0.49 | stroke           | 0.05 | 0.25 |
| rs9473924  | 6:50834157  | RP11-228O6.2 | T | 0.28 | BMI              | 0.22 | 0.17 |
| rs9367716  | 6:57160572  | RNU7-66P     | G | 0.36 | CAD              | 0.9  | 0.88 |
| rs1334576  | 6:7211818   | RREB1        | G | 0.46 | WHR              | 0.09 | 0.81 |
| rs9505118  | 6:7290437   | SSR1         | G | 0.43 | T2D              | 0.15 | 0.34 |
| rs4613862  | 6:82612271  | RP11-379B8.1 | C | 0.17 | CAD              | 0.56 | 0.21 |
| rs17477177 | 7:106411858 | CTB-111H14.1 | C | 0.13 | BP               | 0.51 | 0.14 |
| rs10953541 | 7:107244545 | BCAP29       | T | 0.16 | CAD              | 0.54 | 0.28 |
| rs3807989  | 7:116186241 | CAV1         | A | 0.29 | AF               | 0.25 | 0.8  |
| rs975722   | 7:117332914 | CFTR         | G | 0.36 | CAD              | 0.93 | 0.27 |
| rs11509880 | 7:12261911  | TMEM106B     | G | 0.35 | CAD              | 0.01 | 0.08 |
| rs806215   | 7:127237312 | FSCN3        | T | 0.36 | T2D              | 0.97 | 0.06 |
| rs4731420  | 7:127863295 | MIR129-1     | C | 0.11 | T2D              | 0.54 | 0.91 |
| rs11556924 | 7:129663496 | ZC3HC1       | T | 0.05 | CAD              | 0.32 | 0.85 |
| rs7810507  | 7:130437476 | KLF14        | A | 0.45 | WHR              | 0.31 | 0.66 |
| rs13233731 | 7:130437689 | KLF14        | A | 0.28 | T2D              | 0.28 | 0.23 |
| rs10237377 | 7:139757136 | PARP12       | G | 0.44 | CAD              | 0.95 | 0.02 |
| rs6960043  | 7:15052860  | GTF3AP5      | C | 0.43 | T2D              | 0.85 | 0.58 |
| rs3918226  | 7:150690176 | NOS3         | T | 0    | CAD              | 0.69 | 0.51 |
| rs4142995  | 7:17919258  | SNX13        | G | 0.44 | HDL-C            | 0.06 | 0.36 |
| rs2107595  | 7:19049388  | HDAC9        | A | 0.33 | CAD;stroke       | 0.8  | 0.79 |
| rs10267593 | 7:1937261   | MAD1L1       | A | 0.1  | CAD              | 0.03 | 0.21 |
| rs12535846 | 7:25861072  | AC003090.1   | A | 0.4  | WHR              | 0.19 | 0.08 |
| rs4719841  | 7:25997536  | MIR148A      | A | 0.4  | TG               | 0.13 | 0.56 |
| rs4722766  | 7:28235808  | JAZF1-AS1    | C | 0.5  | T2D              | 0.31 | 0.66 |
| rs4302748  | 7:36191699  | EEPD1        | A | 0.09 | LDL-C            | 0.76 | 0.75 |
| rs10278336 | 7:44245363  | YKT6         | G | 0.35 | T2D              | 0.88 | 0.23 |
| rs10260816 | 7:46010100  | LOC102723446 | C | 0.23 | BP               | 0.65 | 0.55 |
| rs4917014  | 7:50305863  | AC020743.3   | G | 0.31 | HDL-C            | 0.03 | 0.23 |
| rs702485   | 7:6449272   |              | A | 0.14 | HDL-C            | 0.03 | 0.39 |
| rs4724806  | 7:6487131   | DAGLB        | G | 0.25 | CAD              | 0.2  | 0.2  |
| rs35332062 | 7:73012042  | MLXIPL       | A | 0.12 | TG               | 0.47 | 0.63 |
| rs42039    | 7:92244422  | CDK6         | T | 0.02 | stroke           | 0.93 | 0.86 |

|            |             |                    |   |      |                  |       |      |
|------------|-------------|--------------------|---|------|------------------|-------|------|
| rs10093110 | 8:106565414 | ZFPM2              | A | 0.41 | CAD              | 0.64  | 0.68 |
| rs2245019  | 8:116622906 | TRPS1              | C | 0.14 | HDL-C            | 0.47  | 0.26 |
| rs13266634 | 8:118184783 | SLC30A8            | T | 0.42 | T2D              | 0.24  | 0.35 |
| rs2954029  | 8:126490972 | RP11-<br>136O12.2  | A | 0.42 | CAD              | 0.08  | 0.3  |
| rs11136341 | 8:145043543 | PLEC               | G | 0.1  | TC;LDL-C         | 0.78  | 0.92 |
| rs1495741  | 8:18272881  | NAT2               | A | 0.44 | TC;TG            | 0.94  | 0.11 |
| rs6997340  | 8:18286997  | NAT2               | C | 0.47 | CAD              | 0.92  | 0.1  |
| rs10096633 | 8:19830921  | LPL                | T | 0.09 | HDL-C;TG         | 0.66  | 0.83 |
| rs6984210  | 8:22033615  | BMP1               | G | 0    | CAD              | 0.83  | 0.71 |
| rs12549902 | 8:41509259  | NKX6-3             | A | 0.38 | T2D              | 0.14  | 0.51 |
| rs13277801 | 8:59353534  | UBXN2B             | C | 0.19 | LDL-C;TC         | 0.03  | 0.11 |
| rs2081687  | 8:59388565  | CYP7A1             | T | 0.2  | TG;TC;LDL-C      | 0.04  | 0.1  |
| rs12679556 | 8:72514228  | RP11-<br>1102P16.1 | T | 0.25 | WHR              | 0.38  | 0.36 |
| rs4735692  | 8:76615663  | AC016194.1         | A | 0.39 | BMI              | 0.85  | 0.87 |
| rs896854   | 8:95960511  | NDUFAF6            | T | 0.32 | T2D              | 0.73  | 0.16 |
| rs17150703 | 8:9745798   | LINC00599          | A | 0.15 | BMI              | 0.2   | 0.02 |
| rs10820405 | 9:106010237 | LINC01492          | A | 0.26 | stroke           | 0.81  | 0.78 |
| rs2230808  | 9:107562804 | ABCA1              | T | 0.37 | TC;HDL-C         | 0.54  | 0.51 |
| rs2066714  | 9:107586753 | ABCA1              | T | 0.27 | HDL-C;TC         | 0.62  | 0.81 |
| rs1883025  | 9:107664301 | ABCA1              | T | 0.21 | HDL-C;TC         | 0.57  | 0.52 |
| rs2575876  | 9:107665739 | ABCA1              | A | 0.21 | HDL-C;TC         | 0.72  | 0.46 |
| rs3887137  | 9:107698612 | RP11-217B7.2       | T | 0.36 | WHR              | 0.79  | 0.53 |
| rs944172   | 9:110517794 | AL162389.1         | C | 0.23 | CAD              | 0.68  | 0.38 |
| rs4836831  | 9:123496570 | AHCYP2             | C | 0.47 | WC               | 0.68  | 0.24 |
| rs885150   | 9:124420173 | DAB2IP             | C | 0.29 | CAD              | 0.59  | 0.46 |
| rs2519093  | 9:136141870 | ABO                | T | 0.22 | CAD              | 0.003 | 0.1  |
| rs507666   | 9:136149399 | ABO                | A | 0.22 | TC;LDL-C         | 0.01  | 0.13 |
| rs579459   | 9:136154168 | ABO                | C | 0.21 | CAD;TC;LDL-<br>C | 0.004 | 0.12 |
| rs11787792 | 9:139252148 | GPSM1              | G | 0.04 | T2D              | 0.13  | 0.08 |
| rs10757274 | 9:22096055  | CDKN2B-AS1         | G | 0.45 | CAD              | 0.94  | 0.92 |
| rs7859727  | 9:22102165  | CDKN2B-AS1         | C | 0.34 | stroke           | 0.55  | 0.57 |
| rs1333042  | 9:22103813  | CDKN2B-AS1         | A | 0.34 | CAD              | 0.49  | 0.62 |
| rs2383208  | 9:22132076  | CDKN2B-AS1         | G | 0.43 | T2D              | 0.94  | 0.56 |
| rs1575972  | 9:22301092  | RP11-<br>408N14.1  | A | 0.03 | T2D              | 0.99  | 0.8  |
| rs10968576 | 9:28414339  | LINGO2             | G | 0.21 | BMI              | 0.08  | 0.11 |
| rs16933812 | 9:36969205  | PAX5               | G | 0.26 | BMI              | 0.11  | 0.24 |
| rs11142387 | 9:72998332  | KLF9               | C | 0.32 | BMI              | 0.43  | 0.87 |
| rs17791513 | 9:81905590  | CHCHD2P9           | G | 0.06 | T2D              | 0.32  | 0.11 |
| rs16927668 | 9:8369533   | PTPRD              | C | 0.5  | T2D              | 0.93  | 0.77 |
| rs2796441  | 9:84308948  | TLE1               | G | 0.39 | T2D              | 0.85  | 0.17 |

|            |              |               |   |      |             |      |      |
|------------|--------------|---------------|---|------|-------------|------|------|
| rs1211166  | 9:87285992   | NTRK2         | G | 0.21 | BMI         | 0.75 | 0.83 |
| rs10821415 | 9:97713459   | C9orf3        | A | 0.25 | AF          | 0.87 | 0.76 |
| rs7917772  | 10:104487443 | SFXN2         | A | 0.49 | WHR         | 0.51 | 0.29 |
| rs11191416 | 10:104604916 | PFN1P11       | G | 0.36 | CAD         | 0.14 | 0.52 |
| rs4409766  | 10:104616663 | BORCS7        | C | 0.29 | BP          | 0.31 | 0.34 |
| rs12415501 | 10:105324774 | NEURL1        | T | 0.13 | AF          | 0.25 | 0.71 |
| rs2295786  | 10:105616482 | SH3PXD2A      | A | 0.32 | stroke      | 0.77 | 0.5  |
| rs4918072  | 10:105693644 | STN1          | A | 0.19 | CAD         | 0.7  | 0.51 |
| rs1129555  | 10:113910721 | GPAM          | A | 0.32 | LDL-C;TC    | 0.35 | 1    |
| rs2297991  | 10:113913222 | GPAM          | T | 0.32 | HDL-C;TC    | 0.28 | 0.9  |
| rs7903146  | 10:114758349 | TCF7L2        | T | 0.04 | T2D         | 0.19 | 0.26 |
| rs11196288 | 10:115057443 | RNU7-165P     | G | 0.36 | stroke      | 0.27 | 0.91 |
| rs2782980  | 10:115781527 | ADRB1         | T | 0.15 | BP          | 0.1  | 0.27 |
| rs10886471 | 10:121149403 | GRK5          | T | 0.21 | T2D         | 0.67 | 0.37 |
| rs7916879  | 10:12300790  | RN7SL232P     | G | 0.4  | CAD         | 0.71 | 0.94 |
| rs11257655 | 10:12307894  | RN7SL232P     | C | 0.44 | T2D         | 0.59 | 0.93 |
| rs4752700  | 10:124237612 | HTRA1         | G | 0.44 | CAD         | 0.69 | 0.75 |
| rs2487928  | 10:30323892  | KIAA1462      | A | 0.22 | CAD         | 0.26 | 0.52 |
| rs1870634  | 10:44480811  | LINC00841     | T | 0.26 | CAD         | 0.61 | 0.4  |
| rs1832007  | 10:5254847   | AKR1C4        | G | 0.1  | TG          | 0.75 | 0.69 |
| rs7897379  | 10:65301725  | REEP3         | C | 0.37 | TG          | 0.46 | 0.57 |
| rs12242953 | 10:70865342  | SRGN          | A | 0.11 | T2D         | 0.66 | 0.44 |
| rs7901016  | 10:74637326  | MCU           | C | 0.27 | LDL-C       | 0.51 | 0.95 |
| rs10824026 | 10:75421208  | SYNPO2L       | G | 0.39 | AF          | 0.47 | 0.27 |
| rs12571751 | 10:80942631  | ZMIZ1         | G | 0.46 | T2D         | 0.14 | 0.08 |
| rs17680741 | 10:82251514  | TSPAN14       | C | 0.03 | CAD         | 0.45 | 0.58 |
| rs1412444  | 10:91002927  | LIPA          | T | 0.32 | CAD         | 0.87 | 0.77 |
| rs7087591  | 10:94473629  | Y_RNA         | G | 0.24 | T2D         | 0.68 | 0.46 |
| rs2068888  | 10:94839642  | CYP26A1       | G | 0.18 | TG;HDL-C    | 0.68 | 0.5  |
| rs9663362  | 10:95895177  | PLCE1         | G | 0.32 | BP          | 0.66 | 0.58 |
| rs633185   | 11:100593538 | ARHGAP42      | C | 0.49 | BP          | 0.97 | 0.33 |
| rs7947761  | 11:100624599 | ARHGAP42      | G | 0.02 | CAD         | 0.21 | 0.64 |
| rs660599   | 11:102729757 | MMP12         | A | 0.14 | stroke      | 0.01 | 0.02 |
| rs2128739  | 11:103673277 | RP11-563P16.1 | C | 0.38 | CAD         | 0.73 | 0.33 |
| rs180327   | 11:116623659 | BUD13         | C | 0.35 | HDL-C;TG    | 0.31 | 0.62 |
| rs964184   | 11:116648917 | ZPR1          | G | 0.22 | CAD         | 0.22 | 0.83 |
| rs2075291  | 11:116661392 | APOA5         | A | 0.06 | TG;HDL-C    | 0.26 | 0.56 |
| rs651821   | 11:116662579 | APOA5         | C | 0.28 | TC;TG;HDL-C | 0.24 | 0.85 |
| rs12718465 | 11:116707736 | APOA1         | T | 0.03 | HDL-C       | 0.99 | 0.75 |
| rs17122278 | 11:118449370 | ARCN1         | G | 0.47 | TC          | 0.79 | 0.5  |
| rs17135399 | 11:126218541 | DCPS          | G | 0.1  | LDL-C       | 0.38 | 0.53 |
| rs11222084 | 11:130273230 | ADAMTS8       | T | 0.02 | BP          | 0.04 | 0.72 |
| rs3993105  | 11:13303071  | ARNTL         | C | 0.45 | CAD         | 0.01 | 0.46 |
| rs4757391  | 11:16302939  | SOX6          | C | 0.28 | BP          | 0.08 | 0.64 |

|             |              |               |   |      |             |      |      |
|-------------|--------------|---------------|---|------|-------------|------|------|
| rs2334499   | 11:1696849   | FAM99B        | C | 0.17 | T2D         | 0.29 | 0.2  |
| rs5215      | 11:17408630  | KCNJ11        | C | 0.4  | T2D         | 0.42 | 0.93 |
| rs7107784   | 11:2215089   | MIR4686       | G | 0.1  | T2D         | 0.93 | 0.95 |
| rs117601636 | 11:2642037   | KCNQ1         | G | 0.09 | T2D         | 0.75 | 0.9  |
| rs11030104  | 11:27684517  | BDNF          | G | 0.48 | BMI         | 0.01 | 0.15 |
| rs2237892   | 11:2839751   | KCNQ1         | T | 0.32 | BMI         | 0.92 | 0.52 |
| rs2237896   | 11:2858440   | KCNQ1         | A | 0.36 | T2D         | 0.66 | 0.93 |
| rs7116641   | 11:43696917  | RP11-472I20.4 | G | 0.19 | CAD         | 0.59 | 0.07 |
| rs326214    | 11:47298360  | MADD          | A | 0.34 | HDL-C       | 0.1  | 0.63 |
| rs11604680  | 11:47457539  | RAPSN         | G | 0.31 | BMI         | 0.32 | 0.71 |
| rs11601507  | 11:5701074   | TRIM5         | A | 0.11 | CAD         | 0.47 | 0.81 |
| rs751984    | 11:61278246  | LRRC10B       | C | 0.37 | BP          | 0.45 | 0.23 |
| rs174546    | 11:61569830  | FADS1         | T | 0.4  | HDL-C;TG;TC | 0.14 | 0.95 |
| rs174547    | 11:61570783  | FADS1         | C | 0.4  | HDL-C;TC;TG | 0.15 | 0.92 |
| rs12801636  | 11:65391317  | PCNX3         | A | 0.44 | CAD;HDL-C   | 0.05 | 0.1  |
| rs1552224   | 11:72433098  | ARAP1         | C | 0.09 | T2D         | 0.76 | 0.95 |
| rs590121    | 11:75274150  | SERPINH1      | T | 0.19 | CAD         | 0.22 | 0.81 |
| rs499974    | 11:75455021  | RN7SL786P     | A | 0.24 | HDL-C       | 0.36 | 0.11 |
| rs10160804  | 11:8600240   | STK33         | A | 0.46 | BMI         | 0.23 | 0.58 |
| rs10830963  | 11:92708710  | MTNR1B        | G | 0.42 | T2D         | 0.32 | 0.64 |
| rs93138     | 11:9759713   | SWAP70        | G | 0.43 | CAD         | 0.78 | 0.77 |
| rs173396    | 11:9759918   | SWAP70        | A | 0.43 | CAD         | 0.71 | 0.55 |
| rs7965082   | 12:100800193 | SLC17A8       | T | 0.41 | LDL-C;TC    | 0.21 | 0.66 |
| rs2075260   | 12:109696838 | ACACB         | G | 0.27 | TG          | 0.31 | 0.96 |
| rs9593      | 12:109994870 | MMAB          | T | 0.3  | HDL-C       | 0.43 | 0.17 |
| rs7134594   | 12:110000193 | MMAB          | T | 0.3  | HDL-C       | 0.32 | 0.25 |
| rs12229654  | 12:111414461 | LINC01405     | G | 0.17 | BMI         | 0.94 | 0.14 |
| rs6490029   | 12:111698457 | CUX2          | G | 0.28 | AF          | 0.11 | 0.06 |
| rs3184504   | 12:111884608 | SH2B3         | T | 0    | stroke;CAD  | 0.1  | 0.2  |
| rs671       | 12:112241766 | ALDH2         | A | 0.19 | HDL-C       | 0.93 | 0.31 |
| rs11066280  | 12:112817783 | HECTD4        | A | 0.22 | CAD         | 0.44 | 0.09 |
| rs10507248  | 12:114797093 | TBX5          | T | 0.41 | AF          | 0.47 | 0.68 |
| rs35444     | 12:115552437 | RP11-25E2.1   | G | 0.23 | BP;stroke   | 0.59 | 0.31 |
| rs11067763  | 12:116198341 | RP11-110L15.1 | G | 0.38 | BP          | 0.8  | 0.38 |
| rs11830157  | 12:118265441 | KSR2          | G | 0.26 | CAD         | 0.26 | 0.3  |
| rs1169288   | 12:121416650 | HNF1A         | C | 0.42 | LDL-C;TC    | 0.64 | 0.58 |
| rs55783344  | 12:121432299 | HNF1A         | T | 0.12 | T2D         | 0.3  | 0.21 |
| rs2258287   | 12:121454313 |               | C | 0.25 | CAD         | 0.57 | 0.73 |
| rs3213545   | 12:121471337 | OASL          | A | 0.46 | CAD         | 0.85 | 0.38 |
| rs4275659   | 12:123447928 | ABCB9         | T | 0.35 | T2D         | 0.29 | 0.89 |
| rs10773003  | 12:123775127 | SBNO1         | A | 0.29 | HDL-C       | 0.39 | 0.61 |
| rs838880    | 12:125261593 | SCARB1        | T | 0.5  | HDL-C       | 0.16 | 0.94 |

|            |              |                   |   |      |          |       |      |
|------------|--------------|-------------------|---|------|----------|-------|------|
| rs11057830 | 12:125307053 | SCARB1            | A | 0.12 | CAD      | 0.81  | 0.82 |
| rs12581963 | 12:125317125 | SCARB1            | A | 0.16 | CAD      | 0.73  | 0.61 |
| rs7980458  | 12:20162571  | RP11-<br>405A12.2 | G | 0.45 | BP       | 0.95  | 0.17 |
| rs3861086  | 12:20218869  | RP11-<br>664H17.1 | T | 0.39 | CAD      | 0.52  | 0.6  |
| rs7304841  | 12:20577593  | PDE3A             | C | 0.39 | stroke   | 0.42  | 0.72 |
| rs1027087  | 12:26470850  | RP11-283G6.4      | T | 0.31 | WHR      | 0.1   | 0.49 |
| rs10842992 | 12:27963839  | RN7SKP15          | C | 0.35 | T2D      | 0.23  | 0.01 |
| rs80234489 | 12:31441179  | FAM60A            | C | 0.16 | T2D      | 0.15  | 0.41 |
| rs4766228  | 12:4363420   | CCND2-AS1         | A | 0.5  | T2D      | 0.86  | 0.11 |
| rs897057   | 12:50266279  | FAIM2             | T | 0.25 | BMI      | 0.11  | 0.07 |
| rs7306523  | 12:53393964  | EIF4B             | G | 0.32 | LDL-C;TC | 0.15  | 0.53 |
| rs3809128  | 12:56709919  | CNPY2             | T | 0.21 | WC       | 0.95  | 0.9  |
| rs2261181  | 12:66212318  | RPSAP52           | T | 0.12 | T2D      | 0.57  | 0.25 |
| rs7955901  | 12:71433293  | CTD-2021H9.2      | T | 0.33 | T2D      | 0.7   | 0.23 |
| rs11838267 | 12:7175872   | C1S               | C | 0.1  | CAD      | 0.19  | 0.69 |
| rs4883263  | 12:7649484   | CD163             | T | 0.31 | HDL-C    | 0.05  | 0.6  |
| rs17249754 | 12:90060586  | ATP2B1            | A | 0.35 | BP       | 0.82  | 0.53 |
| rs7136259  | 12:90081188  | ATP2B1            | T | 0.38 | CAD      | 0.88  | 0.44 |
| rs4883201  | 12:9082581   | PHC1              | G | 0.32 | TC       | 0.003 | 0.29 |
| rs7306455  | 12:95355541  | NDUFA12           | A | 0.13 | CAD      | 0.75  | 0.26 |
| rs4923678  | 12:95368163  | NDUFA12           | G | 0.15 | CAD      | 0.71  | 0.41 |
| rs34008534 | 12:95381088  | NDUFA12           | G | 0.15 | CAD      | 0.86  | 0.34 |
| rs11838776 | 13:111040681 | COL4A2            | A | 0.09 | CAD      | 0.81  | 0.61 |
| rs1317507  | 13:113631780 |                   | A | 0.23 | CAD      | 0.61  | 0.41 |
| rs9552911  | 13:23864657  | SGCG              | A | 0.22 | T2D      | 0.41  | 0.54 |
| rs9512699  | 13:28029896  | MTIF3             | G | 0.21 | BMI      | 0.12  | 0.36 |
| rs9319428  | 13:28973621  | FLT1              | A | 0.42 | CAD      | 0.01  | 0.02 |
| rs9534262  | 13:32936646  | BRCA2             | T | 0.47 | LDL-C    | 0.14  | 0.47 |
| rs9591012  | 13:33058333  | N4BP2L2           | A | 0.17 | CAD      | 0.36  | 0.01 |
| rs1467605  | 13:47211861  | LRCH1             | A | 0.1  | stroke   | 0.68  | 0.85 |
| rs9568867  | 13:54107352  | RP11-<br>384G23.1 | A | 0.25 | BMI      | 0.72  | 0.67 |
| rs1359790  | 13:80717156  | RP11-470M1.2      | A | 0.28 | T2D      | 0.35  | 0.66 |
| rs7989336  | 13:97017548  | HS6ST3            | A | 0.5  | BMI      | 0.45  | 0.57 |
| rs10139550 | 14:100145710 | HHIPL1            | G | 0.31 | CAD      | 0.69  | 0.72 |
| rs11847697 | 14:30515112  | PRKD1             | T | 0    | BMI      | NA    |      |
| rs2415317  | 14:36609678  | LINC00609         | A | 0.43 | stroke   | 0.04  | 0.14 |
| rs1982963  | 14:52509101  | NID2              | G | 0.18 | WHR      | 0.08  | 0.58 |
| rs2145598  | 14:58794001  | ARID4A            | A | 0.46 | CAD      | 0.32  | 0.68 |
| rs1152591  | 14:64680848  | SYNE2             | A | 0.29 | AF       | 0.13  | 0.26 |
| rs11624704 | 14:78786077  | NRXN3             | C | 0.06 | BMI      | 0.07  | 0.32 |
| rs7403531  | 15:38822905  |                   | T | 0.36 | T2D      | 0.18  | 0.6  |

|            |             |                   |   |      |                    |       |        |
|------------|-------------|-------------------|---|------|--------------------|-------|--------|
| rs67839313 | 15:40619724 | C15orf52          | C | 0.18 | T2D                | 0.24  | 0.3    |
|            |             | intergenic (near  |   |      |                    |       |        |
| rs4471613  | 15:58551694 | ALDH1A2,          | A | 0.06 | stroke             | 0.13  | 0.37   |
|            |             | AQP9, LIPC)       |   |      |                    |       |        |
| rs2043085  | 15:58680954 | ALDH1A2           | T | 0.47 | HDL-C;TG;TC        | 0.51  | 0.25   |
| rs1532085  | 15:58683366 |                   | A | 0.46 | TC;TG;HDL-C        | 0.58  | 0.39   |
| rs1077834  | 15:58723479 | LIPC              | C | 0.39 | HDL-C;TC           | 0.79  | 0.59   |
| rs1800588  | 15:58723675 | LIPC              | T | 0.38 | TG;TC;HDL-C        | 0.99  | 0.78   |
| rs1436953  | 15:62414014 | NPM1P47           | T | 0.36 | T2D                | 0.03  | 0.32   |
| rs6494488  | 15:65024204 | RBPMS2            | G | 0.07 | CAD                | 0.19  | 0.87   |
| rs56062135 | 15:67455630 | SMAD3             | T | 0.02 | CAD                | 0.91  | 0.11   |
| rs4776970  | 15:68080886 | MAP2K5            | A | 0.23 | BMI                | 0.53  | 0.12   |
| rs7164883  | 15:73652174 | HCN4              | G | 0.1  | AF                 | 0.92  | 0.02   |
| rs1378942  | 15:75077367 | CSK               | A | 0.16 | BP                 | 0.14  | 0.95   |
| rs7178572  | 15:77747190 | HMG20A            | G | 0.36 | T2D                | 0.16  | 0.67   |
| rs12438008 | 15:79084680 | ADAMTS7           | A | 0.38 | CAD                | 0.34  | 0.54   |
| rs4468572  | 15:79124475 | MORF4L1           | T | 0.47 | CAD                | 0.27  | 0.59   |
| rs11634397 | 15:80432222 | ZFAND6            | G | 0.09 | T2D                | 0.82  | 0.25   |
| rs8030379  | 15:84590910 | ADAMTSL3          | G | 0.23 | WC                 | 0.18  | 0.26   |
| rs8042271  | 15:89574218 | RP11-<br>326A19.2 | A | 0.34 | CAD                | 0.2   | 0.43   |
| rs2028299  | 15:90374257 | AP3S2             | C | 0.2  | T2D                | 0.43  | 0.72   |
| rs4932370  | 15:91404705 | RN7SL363P         | A | 0.09 | stroke             | 0.56  | 0.98   |
| rs17514846 | 15:91416550 | FURIN             | A | 0.15 | CAD                | 0.45  | 0.78   |
| rs1029420  | 15:91441086 | MAN2A2            | C | 0.1  | BP                 | 0.75  | 0.88   |
| rs79548680 | 15:91505779 | RCCD1             | G | 0.5  | T2D                | 0.51  | 0.13   |
| rs17581137 | 15:96146414 | RP11-61O11.1      | C | 0.11 | CAD                | 0.5   | 0.34   |
| rs12597579 | 16:20257867 | GP2               | T | 0.27 | BMI                | 0.33  | 0.81   |
| rs4788102  | 16:28873398 | SH2B1             | A | 0.14 | BMI                | 0.99  | 0.11   |
| rs2531995  | 16:4013467  | ADCY9             | T | 0.33 | BMI                | 0.047 | <0.001 |
| rs1421085  | 16:53800954 | FTO               | C | 0.12 | T2D                | 0.69  | 0.69   |
| rs1558902  | 16:53803574 | FTO               | A | 0.12 | BMI                | 0.72  | 0.66   |
| rs247616   | 16:56989590 | AC012181.1        | T | 0.16 | HDL-C;TC           | 0.54  | 0.96   |
| rs7499892  | 16:57006590 | CETP              | T | 0.17 | TG;HDL-<br>C;LDL-C | 0.9   | 0.39   |
| rs2303790  | 16:57017292 | CETP              | G | 0.02 | HDL-C              | 0.37  | 0.99   |
| rs2292318  | 16:67985706 | SLC12A4           | T | 0.12 | HDL-C              | 0.7   | 0.23   |
| rs3785100  | 16:67997920 | SLC12A4           | C | 0.12 | HDL-C              | 0.72  | 0.26   |
| rs17358402 | 16:71967927 | PKD1L3            | T | 0.06 | TC;LDL-C           | 0.78  | 0.99   |
| rs7185272  | 16:72013797 | PKD1L3            | G | 0.26 | LDL-C;TC           | 0.5   | 0.75   |
| rs12927205 | 16:72025077 | PKD1L3            | G | 0.26 | LDL-C;TC           | 0.55  | 0.96   |
| rs2000999  | 16:72108093 | HPR               | A | 0.26 | TC;LDL-C           | 0.7   | 0.14   |

|            |             |                |   |      |          |      |      |
|------------|-------------|----------------|---|------|----------|------|------|
| rs7193343  | 16:73029160 | ZFHX3          | C | 0.34 | stroke   | 0.18 | 0.89 |
| rs2106261  | 16:73051620 | ZFHX3          | T | 0.33 | AF       | 0.63 | 0.11 |
| rs12932445 | 16:73069888 | ZFHX3          | C | 0.36 | stroke   | 0.77 | 0.29 |
| rs7202877  | 16:75247245 | CTRB1          | G | 0.19 | T2D      | 0.98 | 0.56 |
| rs7206541  | 16:75436713 | CFDP1          | A | 0.48 | CAD      | 0.99 | 0.4  |
| rs1424233  | 16:79682751 | AC009159.1     | C | 0.33 | BMI      | 0.06 | 0.06 |
| rs2925979  | 16:81534790 | CMIP           | T | 0.41 | HDL-C    | 0.58 | 0.3  |
| rs7199941  | 16:81906423 | PLCG2          | A | 0.5  | CAD      | 0.69 | 0.92 |
| rs7500448  | 16:83045790 | CDH13          | G | 0.24 | CAD      | 0.7  | 0.4  |
| rs12445022 | 16:87575332 | RP11-482M8.1   | A | 0.09 | stroke   | 0.02 | 0.05 |
| rs12936587 | 17:17543722 | RP11-524F11.3  | A | 0.11 | CAD      | 0.98 | 0.65 |
| rs216172   | 17:2126504  | SMG6           | C | 0.26 | CAD      | 0.27 | 0.41 |
| rs391300   | 17:2216258  | SRR            | T | 0.29 | T2D      | 0.96 | 0.85 |
| rs13723    | 17:27941886 | CORO6          | G | 0.3  | CAD      | 0.28 | 0.68 |
| rs76954792 | 17:30033514 | RP11-805L22.1  | T | 0.07 | CAD      | 0.05 | 0.12 |
| rs11651052 | 17:36102381 | HNF1B          | A | 0.27 | T2D      | 0.6  | 0.3  |
| rs7208487  | 17:37543449 | FBXL20         | G | 0.27 | HDL-C    | 0.13 | 0.89 |
| rs11869286 | 17:37813856 | STARD3         | C | 0.44 | HDL-C    | 0.05 | 0.63 |
| rs2074158  | 17:40257163 | DHX58          | C | 0.12 | CAD      | 0.81 | 0.77 |
| rs12946454 | 17:43208121 | PLCD3          | T | 0.21 | BP       | 0.02 | 0.25 |
| rs17608766 | 17:45013271 | GOSR2          | C | 0    | CAD      | 0.82 | 0.49 |
| rs9299     | 17:46669430 | HOXB5          | C | 0.47 | BMI      | 0.09 | 0.03 |
| rs7405452  | 17:46674670 | HOXB6          | T | 0.17 | BP       | 0.47 | 0.97 |
| rs46522    | 17:46988597 | UBE2Z          | C | 0.28 | CAD      | 0.99 | 0.81 |
| rs7213603  | 17:59003189 | BCAS3          | C | 0.13 | CAD      | 0.88 | 0.65 |
| rs7225581  | 17:59017813 | BCAS3          | A | 0.13 | CAD      | 0.84 | 0.68 |
| rs2240736  | 17:59485393 | TBX2           | T | 0.44 | BP       | 0.8  | 0.27 |
| rs1867624  | 17:62387091 | RPL31P57       | C | 0.21 | CAD      | 0.63 | 0.81 |
| rs9892152  | 17:62401965 | RPL31P57       | T | 0.33 | CAD      | 0.36 | 0.81 |
| rs4148008  | 17:66875294 | ABCA8          | G | 0.43 | HDL-C    | 0.49 | 0.97 |
| rs12453914 | 17:67138878 | ABCA6          | A | 0.42 | LDL-C;TC | 0.18 | 0.45 |
| rs11077501 | 17:68526061 | RP11-1058G23.1 | C | 0.29 | WHR      | 0.11 | 0.58 |
| rs13342232 | 17:6945940  | SLC16A11       | G | 0.12 | T2D      | 0.61 | 0.52 |
| rs4129767  | 17:76403984 | PGS1           | A | 0.33 | HDL-C    | 0.67 | 0.13 |
| rs7503807  | 17:78591111 | RPTOR          | C | 0.3  | BMI      | 0.72 | 0.65 |
| rs1805081  | 18:21140432 | NPC1           | C | 0.23 | BMI      | 0.81 | 0.56 |
| rs2000813  | 18:47093864 | LIPG           | T | 0.29 | HDL-C    | 0.84 | 0.73 |
| rs12970066 | 18:47107152 | LIPG           | G | 0.28 | HDL-C    | 0.68 | 0.59 |
| rs4939883  | 18:47167214 | SMUG1P1        | T | 0.18 | HDL-C;TC | 0.46 | 0.9  |
| rs2156552  | 18:47181668 | SMUG1P1        | A | 0.18 | HDL-C    | 0.86 | 0.92 |
| rs11660468 | 18:47209143 | SMUG1P1        | T | 0.22 | CAD      | 0.88 | 0.58 |
| rs35337492 | 18:47210824 | SMUG1P1        | A | 0.22 | CAD      | 0.86 | 0.46 |
| rs663129   | 18:57838401 | RNU4-17P       | A | 0.21 | CAD      | 0.94 | 0.1  |

|             |             |              |   |      |                   |      |      |
|-------------|-------------|--------------|---|------|-------------------|------|------|
| rs8090011   | 18:7068462  |              | C | 0.3  | T2D               | 0.44 | 0.17 |
| rs2229383   | 19:10794630 | ILF3-SLC44A2 | G | 0.4  | stroke            | 0.77 | 0.75 |
| rs7258189   | 19:11169947 | SMARCA4      | C | 0.12 | stroke            | 0.86 | 0.98 |
| rs56289821  | 19:11188247 | LDLR         | A | 0.01 | CAD               | 0.9  | 0.74 |
| rs200990725 | 19:11217315 | LDLR         | T | 0    | TC;LDL-C          | 0.37 | 0.93 |
| rs7258950   | 19:11250139 | SPC24        | A | 0.22 | LDL-C;TC          | 0.94 | 0.76 |
| rs11557092  | 19:11257018 | SPC24        | T | 0.26 | TC;LDL-C          | 0.07 | 0.52 |
| rs737337    | 19:11347493 | DOCK6        | C | 0.28 | LDL-C;HDL-C;TC    | 0.83 | 0.74 |
| rs73015714  | 19:17855763 | FCHO1        | G | 0.03 | CAD               | 0.47 | 0.08 |
| rs58542926  | 19:19379549 | TM6SF2       | T | 0.07 | TC;TG;LDL-C       | 0.57 | 0.7  |
| rs10401969  | 19:19407718 | SUGP1        | C | 0.1  | T2D               | 0.31 | 0.68 |
| rs740406    | 19:2232221  |              | G | 0.3  | BP                | 0.56 | 0.23 |
| rs16967013  | 19:32859514 | ZNF507       | G | 0.4  | CAD               | 0.67 | 0.53 |
| rs29941     | 19:34309532 | KCTD15       | G | 0.23 | BMI               | 0.89 | 0.26 |
| rs7258445   | 19:41855515 | TGFB1        | A | 0.39 | CAD               | 0.05 | 0.55 |
| rs769449    | 19:45410002 | APOE         | A | 0.09 | TG;HDL-C;LDL-C;TC | 0.54 | 0.84 |
| rs72654473  | 19:45414399 | APOC1        | A | 0.08 | TC;TG             | 0.51 | 0.19 |
| rs439401    | 19:45414451 | APOC1        | C | 0.41 | HDL-C;TC;TG       | 0.92 | 0.65 |
| rs4420638   | 19:45422946 | APOC1        | G | 0.12 | CAD               | 0.64 | 0.92 |
| rs8108269   | 19:46158513 | RN7SL836P    | T | 0.5  | T2D               | 0.69 | 0.56 |
| rs2302593   | 19:46196634 | GIPR         | G | 0.42 | CAD               | 0.09 | 0.16 |
| rs3810291   | 19:47569003 | ZC3H4        | A | 0.3  | BMI               | 0.84 | 0.21 |
| rs17695224  | 19:52324216 | FPR3         | A | 0.19 | HDL-C             | 0.38 | 0.9  |
| rs1887320   | 20:10965998 | RP11-103J8.1 | G | 0.47 | BP                | 0.73 | 0.16 |
| rs2328223   | 20:17845921 | RIN2         | C | 0.2  | LDL-C             | 0.55 | 0.79 |
| rs867186    | 20:33764554 | PROCR        | G | 0.06 | CAD               | 0.09 | 0.06 |
| rs4911495   | 20:33971978 | UQCC1        | C | 0.16 | WHR               | 0.57 | 0.79 |
| rs6065311   | 20:39724338 | TOP1         | T | 0.18 | LDL-C             | 0.89 | 0.88 |
| rs6093446   | 20:39780932 | PLCG1        | A | 0.3  | CAD               | 0.96 | 0.05 |
| rs4812829   | 20:42989267 | HNF4A        | A | 0.44 | T2D               | 0.65 | 0.33 |
| rs3827066   | 20:44586023 | ZNF335       | T | 0.06 | CAD               | 0.1  | 0.02 |
| rs16990971  | 20:44601293 | ZNF335       | G | 0.06 | TG                | 0.7  | 0.29 |
| rs13041126  | 20:51092996 | LINC01524    | C | 0.3  | BMI               | 0.17 | 0.61 |
| rs2057291   | 20:57472043 | GNAS         | A | 0.27 | CAD;WC            | 0.57 | 0.78 |
| rs6038557   | 20:6594349  | RP5-971N18.3 | G | 0.19 | WC                | 0.46 | 0.37 |
| rs181359    | 22:21928641 | UBE2L3       | A | 0.47 | HDL-C             | 0.21 | 0.48 |
| rs181360    | 22:21928916 | UBE2L3       | G | 0.47 | HDL-C             | 0.22 | 0.44 |
| rs16999793  | 22:24656875 | POM121L9P    | C | 0.1  | CAD               | 0.41 | 0.32 |
| rs4821382   | 22:35638115 | SCUBE1       | G | 0.38 | WHR               | 0.57 | 0.19 |
| rs5996074   | 22:42236337 | SREBF2       | G | 0.46 | BMI               | 0.38 | 0.28 |



|           |             |        |   |      |    |      |      |
|-----------|-------------|--------|---|------|----|------|------|
| rs738409  | 22:44324727 | PNPLA3 | G | 0.45 | TG | 0.36 | 0.28 |
| rs1800234 | 22:46615880 | PPARA  | C | 0.05 | TG | 0.02 | 0.1  |

Significant interactions were colored red at  $P < 0.001$ . No statistically significant multiplicative and additive interactions between each single SNP included in the PRS and fruit intake were observed after correction for multiple testing (Bonferroni-adjusted significance threshold of  $P < 0.05/534$ ).

Abbreviations: AF, atrial fibrillation; AP, attributable proportion due to the interaction; BMI, body mass index; BP, blood pressure; CAD, coronary artery disease; CI, confidence interval; DBP, diastolic blood pressure; HDL-C, high-density lipoprotein cholesterol; LDL-C, low-density lipoprotein cholesterol; MAF, minor allele frequency; MAP, mean arterial pressure; PP, pulse pressure; RERI, relative excess risk due to interaction; SBP, systolic blood pressure; SNP, single nucleotide polymorphism; T2D, type 2 diabetes; TC, total cholesterol; TG, triglycerides; WC, waist circumference; WHR, waist hip ratio.

**Table S2. Baseline characteristics by the genetic risk score and the daily fruit intake**

| Characteristic                     | Genetic risk score |                            |                  |                | Fruit intake              |                                        |                          | <i>P</i> value |
|------------------------------------|--------------------|----------------------------|------------------|----------------|---------------------------|----------------------------------------|--------------------------|----------------|
|                                    | Low<br>(n=6974)    | Intermediate<br>(n=20,923) | High<br>(n=6974) | <i>P</i> value | <200 g/week<br>(n=11,928) | 200 g/week–<br>100 g/day<br>(n=12,867) | >100 g/day<br>(n=10,076) |                |
| Age, year                          | 55±10              | 55±10                      | 55±10            | <0.001         | 56±10                     | 55±10                                  | 55±10                    | <0.001         |
| Female, n (%)                      | 4047 (58)          | 12,018 (57)                | 4063 (58)        | 0.41           | 6888 (58)                 | 7382 (57)                              | 5858 (58)                | 0.51           |
| Northern, n (%)                    | 2393 (34)          | 10,243 (49)                | 4190 (60)        | <0.001         | 3391 (33)                 | 6909 (54)                              | 5926 (59)                | <0.001         |
| Urban residence, n (%)             | 1266 (18)          | 3350 (16)                  | 997 (14)         | <0.001         | 992 (8.3)                 | 1817 (14)                              | 2804 (28)                | <0.001         |
| High-school or above, n (%)        | 3227 (46)          | 9771 (47)                  | 3325 (48)        | 0.23           | 4308 (36)                 | 6205 (48)                              | 5810 (58)                | <0.001         |
| Current smoker, n (%)              | 1637 (24)          | 4968 (24)                  | 1588 (23)        | 0.24           | 3081 (26)                 | 2947 (23)                              | 2165 (22)                | <0.001         |
| Alcohol drinker, n (%)             | 1310 (19)          | 4996 (24)                  | 1786 (26)        | <0.001         | 2906 (24)                 | 2860 (22)                              | 2326 (23)                | <0.001         |
| Family history of stroke, n (%)    | 664 (9.5)          | 2056 (9.8)                 | 771 (11)         | 0.004          | 1118 (9.4)                | 1237 (9.6)                             | 1136 (11)                | <0.001         |
| Ideal physical activity, n (%)     | 4305 (62)          | 13,180 (63)                | 4421 (63)        | 0.09           | 7886 (66)                 | 8120 (63)                              | 5900 (59)                | <0.001         |
| Ideal diet score, n (%)            | 3763 (54)          | 10,800 (52)                | 3542 (51)        | <0.001         | 5421 (45)                 | 6719 (52)                              | 5965 (59)                | <0.001         |
| Body mass index, kg/m <sup>2</sup> | 24±4               | 24±4                       | 24±4             | <0.001         | 24±4                      | 24±4                                   | 24±4                     | <0.001         |
| Waist circumference, cm            | 81±10              | 82±10                      | 83±10            | <0.001         | 81±10                     | 82±10                                  | 83±10                    | <0.001         |
| Hypertension, n (%)                | 2273 (33)          | 7982 (38)                  | 3125 (45)        | <0.001         | 4371 (37)                 | 5005 (39)                              | 4004 (40)                | <0.001         |
| Diabetes mellitus, n (%)           | 512 (7.5)          | 1724 (8.4)                 | 689 (10)         | <0.001         | 1059 (9.1)                | 1044 (8.3)                             | 822 (8.4)                | 0.06           |
| Dyslipidemia, n (%)                | 1988 (29)          | 6616 (32)                  | 2468 (36)        | <0.001         | 3654 (31)                 | 4128 (33)                              | 3290 (34)                | 0.003          |

Mean ± standard deviation for continuous variables and numbers (percentages) for dichotomous variables. Ideal physical activity level was defined as at least 150 minutes/week of moderate physical activity or 75 minutes/week of vigorous physical activity or an equivalent combination. The ideal diet was defined as healthy diet score ≥2 components: red meat <75 g/day, legumes ≥125 g/day, fish ≥200 g/week, and tea ≥3 times/week.

**Table S3. Association of the stroke risk with the sociodemographic and behavioral factors\***

| <b>Character</b>         | <b>HR (95% CI)</b>  | <b>P value</b> |
|--------------------------|---------------------|----------------|
| Age                      | 1.069 (1.065–1.074) | <0.001         |
| Sex                      | 0.81 (0.75–0.87)    | <0.001         |
| Northern                 | 1.28 (1.18–1.39)    | <0.001         |
| Urbanization             | 0.75 (0.62–0.91)    | 0.003          |
| High-school or above     | 0.54 (0.50–0.59)    | <0.001         |
| Current smoker           | 1.17 (1.07–1.29)    | <0.001         |
| Alcohol drinker          | 0.92 (0.84–1.02)    | 0.11           |
| Family history of stroke | 1.50 (1.33–1.70)    | <0.001         |
| Ideal physical activity  | 0.85 (0.78–0.92)    | <0.001         |
| Ideal diet score         | 0.73 (0.68–0.79)    | <0.001         |
| Body mass index          | 1.02 (1.00–1.03)    | <0.001         |
| Vegetable intake         | 1.04 (0.96–1.14)    | 0.31           |

\*Univariate Cox regression model was used.

**Table S4. Multivariable-adjusted HRs (95% CIs) for genetic risk, fruit intake and incident stroke**

| Analysis                        | Category             | No. of events | Total No. | Person-time<br>at risk | Incidence <sup>§</sup> | Base model       |                | Full model       |                |
|---------------------------------|----------------------|---------------|-----------|------------------------|------------------------|------------------|----------------|------------------|----------------|
|                                 |                      |               |           |                        |                        | HR (95% CI)      | <i>P</i> trend | HR (95% CI)      | <i>P</i> trend |
| <b>Genetic risk*</b>            | Low                  | 416           | 6974      | 68,403                 | 6.6 (5.9–7.3)          | Reference        | <0.001         | Reference        | <0.001         |
|                                 | Intermediate         | 1535          | 20,923    | 202,045                | 7.7 (7.3–8.2)          | 1.19 (1.06–1.32) |                | 1.15 (1.03–1.29) |                |
|                                 | High                 | 635           | 6974      | 66,862                 | 8.6 (8.0–9.3)          | 1.51 (1.33–1.71) |                | 1.44 (1.27–1.63) |                |
| <b>Fruit intake<sup>#</sup></b> | <200 g/week          | 1098          | 11,928    | 115,692                | 8.4 (7.9–9.0)          | Reference        | <0.001         | Reference        | <0.001         |
|                                 | 200 g/week–100 g/day | 952           | 12,867    | 125,755                | 7.8 (7.3–8.3)          | 0.81 (0.74–0.89) |                | 0.81 (0.74–0.89) |                |
|                                 | >100 g/day           | 536           | 10,076    | 95,864                 | 6.6 (6.1–7.2)          | 0.68 (0.61–0.76) |                | 0.69 (0.62–0.77) |                |

<sup>§</sup>Age- and sex-adjusted incidence rates per 1000 person-years of stroke were calculated using Poisson regression.

HRs were derived from the Cox proportional hazards model stratified by cohort.

\*Base model for genetic risk was adjusted for age (continuous), sex (male, female). Full model was further adjusted for region (North/South China), urbanization (urban, rural), education level (less than high school, high school or above), current smoking status (yes, no), alcohol drinking status (yes, no), physical activity (continuous), body mass index (continuous), diet score (continuous), and vegetables intake (daily intake  $\geq 500$  g/day or not).

<sup>#</sup>Base model for fruit intake was adjusted for age (continuous), sex (male, female), region (North/South China), urbanization (urban, rural), and education level (less than high school, high school or above). Full model was further adjusted for current smoking status (yes, no), alcohol drinking status (yes, no), physical activity (continuous), body mass index (continuous), diet score (continuous), and vegetables intake (daily intake  $\geq 500$  g/day or not).

Abbreviations: CI, confidence interval; HR, hazard ratio.

**Table S5. Sensitivity analysis of the fruit intake associated with incident stroke, according to the genetic risk category**

|                                  | Using chronological age<br>as the time-scale* |                | Using competing risk<br>model # |                | Adjusting smoking pack<br>year and daily alcohol<br>intake† |                | Further adjusting family<br>history of stroke‡ |                | Further adjusting per-<br>capita household income¶ |                |
|----------------------------------|-----------------------------------------------|----------------|---------------------------------|----------------|-------------------------------------------------------------|----------------|------------------------------------------------|----------------|----------------------------------------------------|----------------|
|                                  | HR (95% CI)                                   | <i>P</i> trend | HR (95% CI)                     | <i>P</i> trend | HR (95% CI)                                                 | <i>P</i> trend | HR (95% CI)                                    | <i>P</i> trend | HR (95% CI)                                        | <i>P</i> trend |
| <b>Low genetic risk</b>          |                                               |                |                                 |                |                                                             |                |                                                |                |                                                    |                |
| <200 g/week                      | Reference                                     | 0.048          | Reference                       | 0.03           | Reference                                                   | 0.02           | Reference                                      | 0.04           | Reference                                          | 0.04           |
| 200 g/week–100<br>g/day          | 0.84 (0.67–1.06)                              |                | 0.85 (0.67–1.07)                |                | 0.81 (0.64–1.03)                                            |                | 0.81 (0.64–1.02)                               |                | 0.82 (0.65–1.04)                                   |                |
| >100 g/day                       | 0.74 (0.56–0.98)                              |                | 0.72 (0.55–0.95)                |                | 0.70 (0.52–0.93)                                            |                | 0.72 (0.55–0.96)                               |                | 0.72 (0.54–0.96)                                   |                |
| <b>Intermediate genetic risk</b> |                                               |                |                                 |                |                                                             |                |                                                |                |                                                    |                |
| <200 g/week                      | Reference                                     | <0.001         | Reference                       | <0.001         | Reference                                                   | <0.001         | Reference                                      | <0.001         | Reference                                          | <0.001         |
| 200 g/week–100<br>g/day          | 0.82 (0.73–0.93)                              |                | 0.82 (0.72–0.92)                |                | 0.81 (0.72–0.92)                                            |                | 0.83 (0.74–0.93)                               |                | 0.82 (0.73–0.92)                                   |                |
| >100 g/day                       | 0.68 (0.59–0.79)                              |                | 0.68 (0.59–0.79)                |                | 0.66 (0.57–0.77)                                            |                | 0.69 (0.60–0.80)                               |                | 0.68 (0.58–0.78)                                   |                |
| <b>High genetic risk</b>         |                                               |                |                                 |                |                                                             |                |                                                |                |                                                    |                |
| <200 g/week                      | Reference                                     | 0.002          | Reference                       | 0.005          | Reference                                                   | 0.01           | Reference                                      | 0.006          | Reference                                          | 0.005          |
| 200 g/week–100<br>g/day          | 0.82 (0.68–0.99)                              |                | 0.82 (0.68–0.99)                |                | 0.78 (0.64–0.94)                                            |                | 0.82 (0.68–0.99)                               |                | 0.82 (0.68–0.99)                                   |                |
| >100 g/day                       | 0.69 (0.55–0.86)                              |                | 0.71 (0.56–0.88)                |                | 0.71 (0.57–0.89)                                            |                | 0.72 (0.58–0.89)                               |                | 0.71 (0.57–0.88)                                   |                |

HRs were derived from the Cox proportional hazards model stratified by cohort.

\* Adjusted for sex, region, urbanization, education level, current smoking status, alcohol drinking status, physical activity, body mass index, diet score, and vegetables intake. # Adjusted for age, sex, region, urbanization, education level, current smoking status, alcohol drinking status, physical activity, body mass index, diet score, and vegetables intake. † Adjusted for smoking pack year and daily alcohol intake (g ethanol/day) instead of categorical variables. ‡ Adjusted for age, sex, region, urbanization, education level, current smoking status, alcohol drinking status, physical activity, body mass index, diet score, vegetables intake, and family history of stroke. ¶ Adjusted

---

for age, sex, region, urbanization, education level, current smoking status, alcohol drinking status, physical activity, body mass index, diet score, vegetables intake, and per-capita household income. Abbreviations: CI, confidence interval; HR, hazard ratio.

**Table S6. Risk of incident stroke, according to the fruit intake frequency and genetic risk**

|                           | No. events/<br>Total No. | Incidence*     | Full model       |                |                                                                                                                | Absolute risk over<br>10 years (95% CI) | Absolute risk<br>reduction over<br>10 years | <i>P</i> trend |
|---------------------------|--------------------------|----------------|------------------|----------------|----------------------------------------------------------------------------------------------------------------|-----------------------------------------|---------------------------------------------|----------------|
|                           |                          |                | HR (95% CI)      | <i>P</i> trend | <i>P</i> interaction                                                                                           |                                         |                                             |                |
| Low genetic risk          |                          |                |                  | <0.001         |                                                                                                                |                                         |                                             |                |
| Never or rarely           | 208 / 2469               | 7.8 (6.8–9.0)  | Reference        |                | <i>P</i> multiplicative<br>interaction =0.89                                                                   | 5.2% (4.3–6.1)                          | 0 (Reference)                               |                |
| Weekly                    | 135 / 2708               | 6.0 (5.0–7.1)  | 0.64 (0.51–0.81) |                |                                                                                                                | 3.4% (2.7–4.0)                          | 1.8%                                        |                |
| Daily                     | 73 / 1797                | 5.7 (4.5–7.2)  | 0.57 (0.42–0.76) |                |                                                                                                                | 2.9% (2.2–3.7)                          | 2.3%                                        |                |
| Intermediate genetic risk |                          |                |                  | <0.001         |                                                                                                                |                                         |                                             |                |
| Never or rarely           | 770 / 7547               | 9.4 (8.7–10.2) | Reference        |                | <i>P</i> additive<br>interaction =0.65<br>RERI=0.07 (95%<br>CI: –0.21–0.34)<br>AP=0.04 (95%<br>CI: –0.10–0.17) | 6.0% (5.4–6.5)                          | 0 (Reference)                               | 0.03           |
| Weekly                    | 528 / 7922               | 7.2 (6.6–7.9)  | 0.75 (0.67–0.84) |                |                                                                                                                | 4.5% (4.0–4.9)                          | 1.5%                                        |                |
| Daily                     | 237 / 5454               | 6.0 (5.3–6.8)  | 0.56 (0.48–0.66) |                |                                                                                                                | 3.4% (2.9–3.8)                          | 2.6%                                        |                |
| High genetic risk         |                          |                |                  | <0.001         |                                                                                                                |                                         |                                             |                |
| Never or rarely           | 308 / 2550               | 9.9 (8.8–11.1) | Reference        |                |                                                                                                                | 8.3% (7.2–9.4)                          | 0 (Reference)                               |                |
| Weekly                    | 219 / 2542               | 8.1 (7.1–9.2)  | 0.75 (0.63–0.90) |                |                                                                                                                | 6.3% (5.4–7.2)                          | 2.0%                                        |                |
| Daily                     | 108 / 1882               | 7.8 (6.4–9.4)  | 0.53 (0.42–0.67) |                |                                                                                                                | 4.5% (3.6–5.4)                          | 3.8%                                        |                |

\*Age- and sex-adjusted incidence rates per 1000 person-years of stroke were calculated using Poisson regression.

‘Never or rarely’ consumers refer to participants whose fruit intake was zero or who eats less than three times per month. ‘Weekly’ consumers were defined as a person who eats 1–6 times per week. ‘Daily’ consumers were defined as a person who eats fruit every day.

HRs were derived from the Cox proportional hazards model stratified by cohort and adjusted for age (continuous), sex (male, female), region (North/South China), urbanization (urban, rural), education level (less than high school, high school or above), current smoking status (yes, no), alcohol drinking status (yes, no), physical activity (continuous), body mass index (continuous), diet score (continuous), and vegetables intake (daily intake  $\geq 500$  g/day or not). Multiplicative interaction was evaluated using hazard ratios for the product term between the fruit intake frequency (never or rarely vs daily) and PRS (low vs high). To estimate the additive interaction, participants with fruit intake frequency of daily or weekly and the low genetic risk (quintile 1 of PRS) were used as the reference with consideration of practical interpretation. Two indexes were calculated: relative excess risk due to interaction (RERI) and attributable proportion due to the interaction (AP). Abbreviations: CI, confidence interval; HR, hazard ratio; PRS, polygenic risk score.

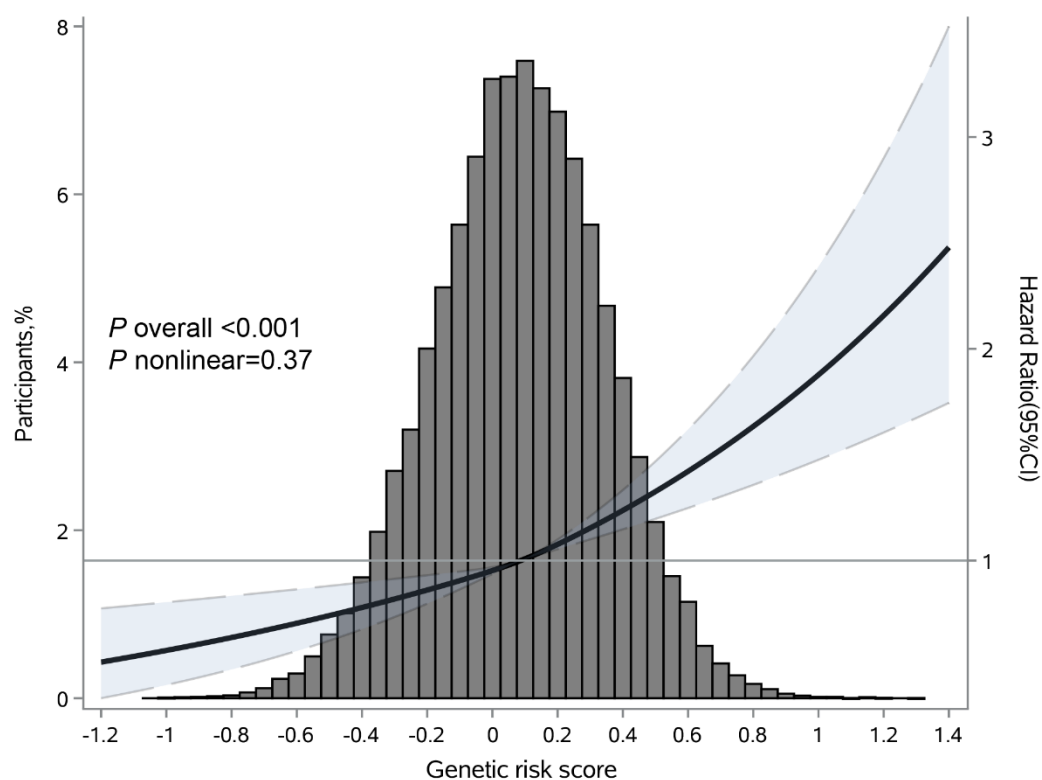

**Figure S1.** Associations between the genetic risk score and incident stroke. Data were fitted by restricted cubic spline Cox proportional hazards models, with three knots placed at 25th, 50th (reference), and 75th percentiles of genetic risk score as a continuous variable. Solid curves represent point estimates and dashed curves represent 95% CI. Model was adjusted for age (continuous), sex (male, female), and cohort. Abbreviations: CI, confidence interval.



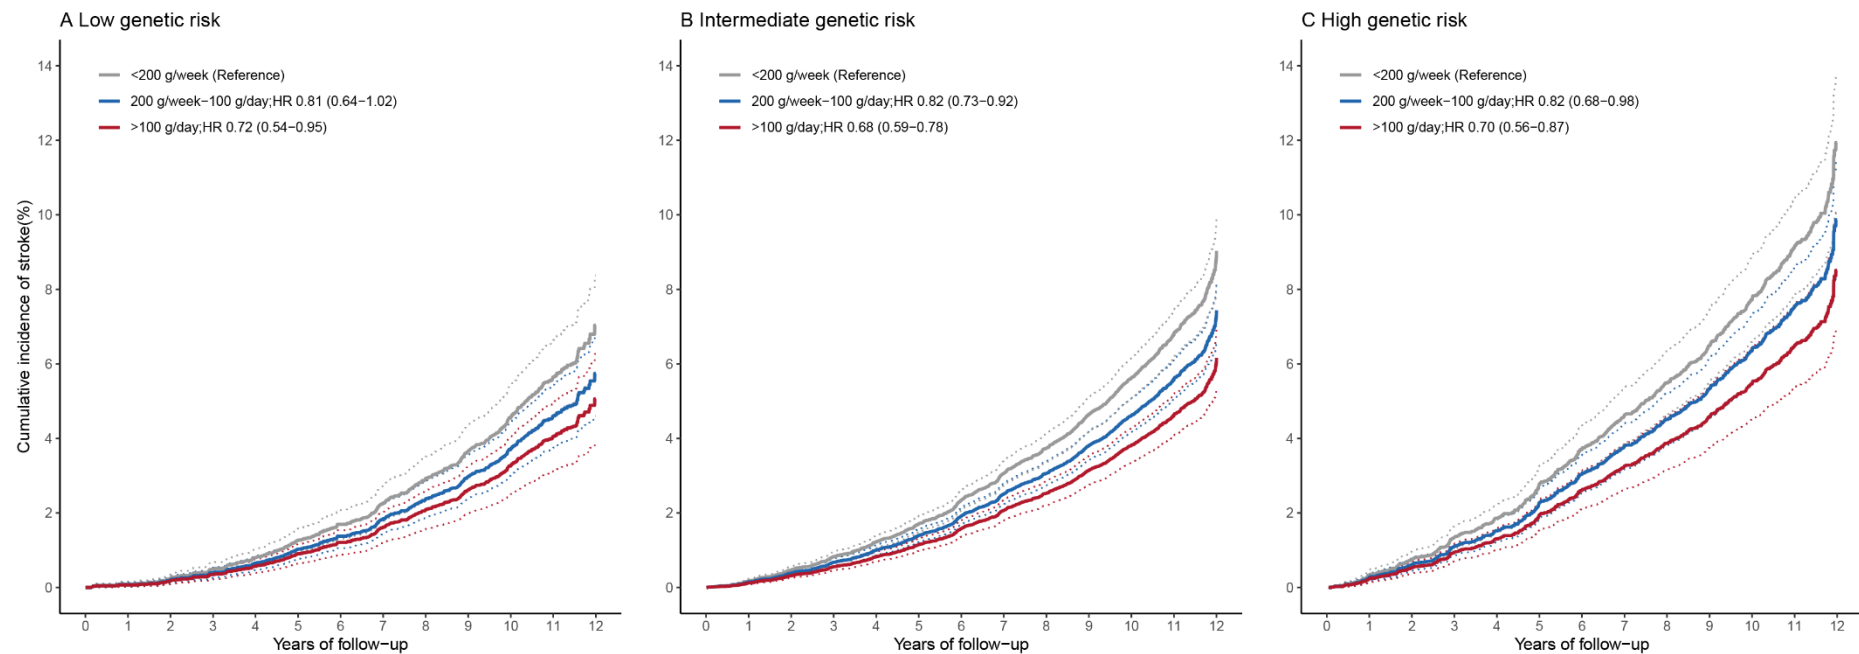

**Figure S2.** Cumulative incidence of stroke, according to the categories of the genetic risk and fruit intake. Solid lines represented point estimates and dashed lines were 95% confidence intervals. The overall genetic risk for stroke was defined as high (quintile 5 of PRS), intermediate (quintile 2–4 of PRS), and low (quintile 1 of PRS). Models were adjusted for cohort, age, sex, region, urbanization, education level, current smoking status, alcohol drinking status, physical activity, body mass index, diet score, and vegetables intake, which was performed on population averages for each covariate. Abbreviations: HR, hazard ratio; PRS, polygenic risk score.
